# Supplementary material for: Development of molecular clamp stabilized hemagglutinin vaccines for Influenza A viruses
Source: PubMed Central journal article supplement (PMC8575991; doi:10.1038/s41541-021-00395-4), 2021-11-08
Supplement: 41541_2021_395_MOESM1_ESM.pdf [file 41541_2021_395_MOESM1_ESM.pdf]

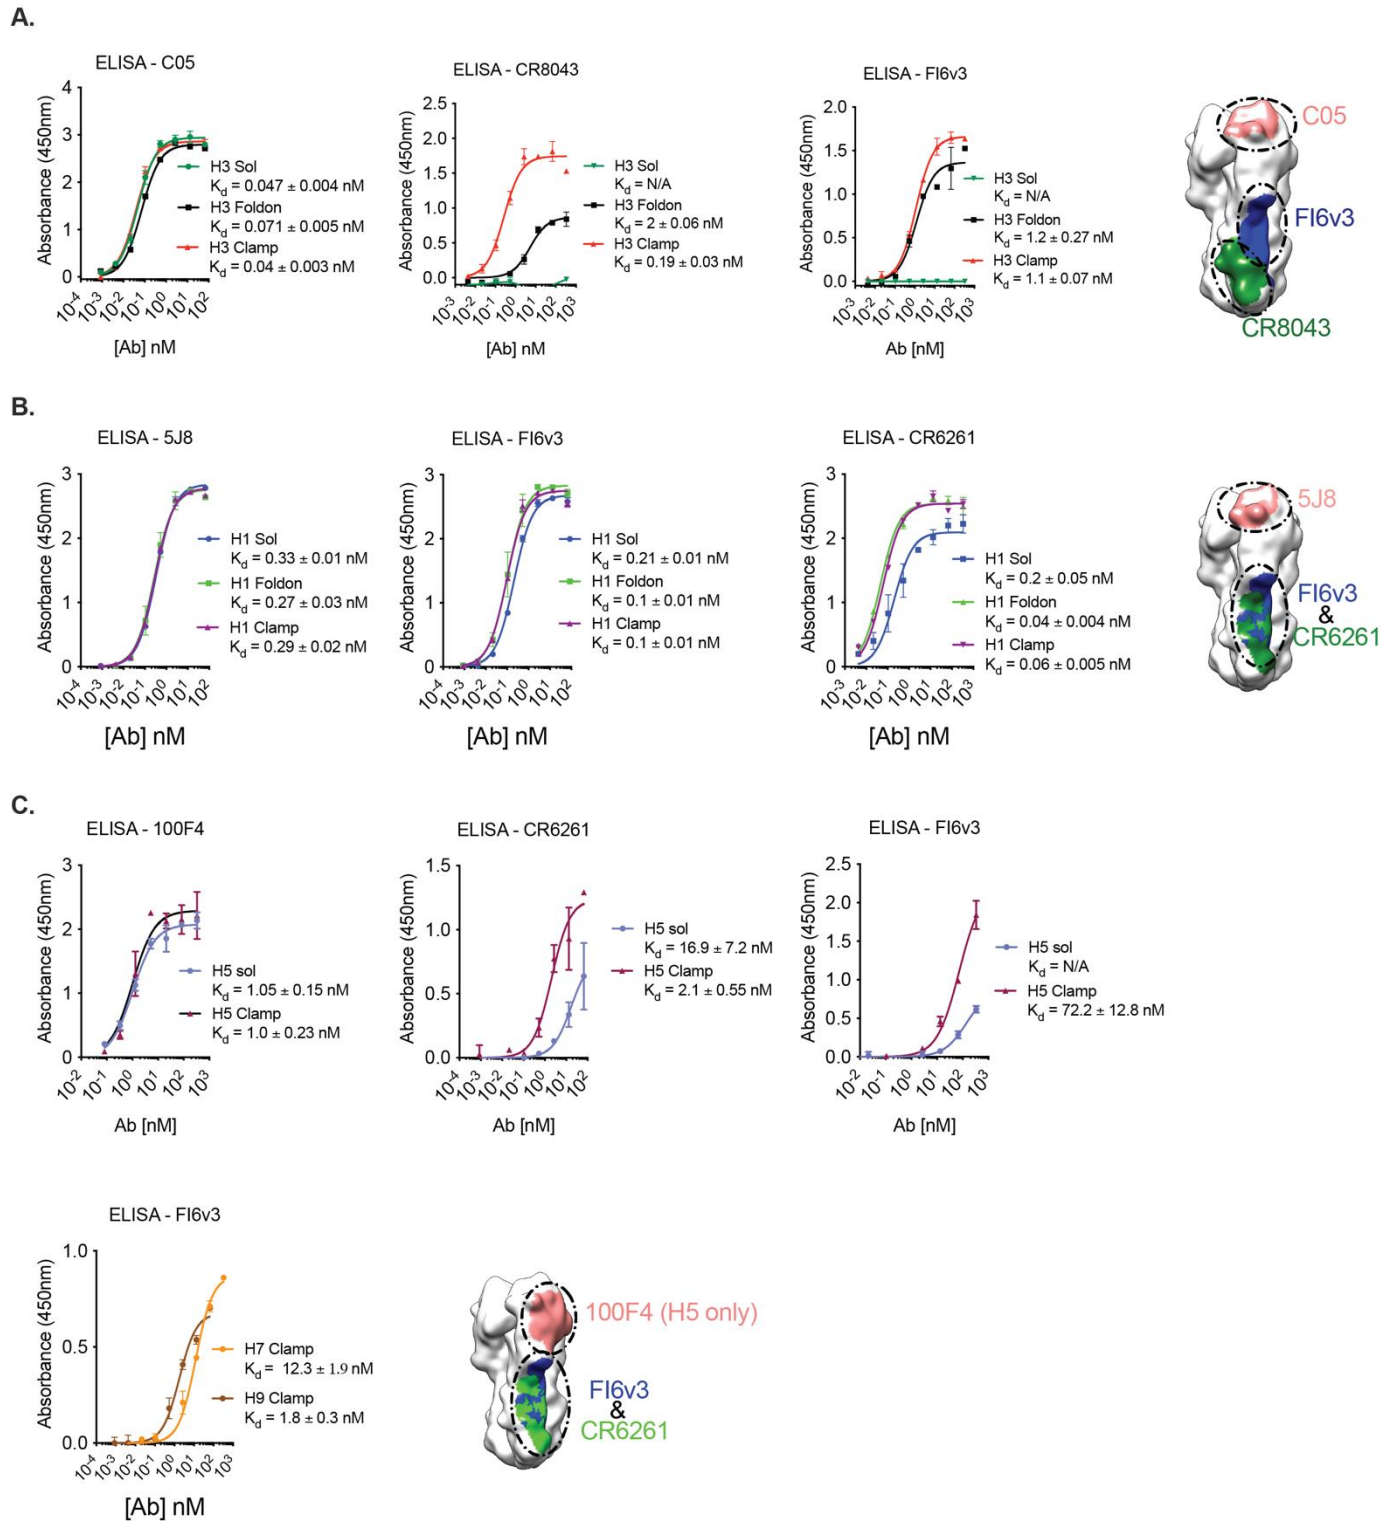

**Supplementary figure 1: ELISA curves of mAbs binding to different HA proteins.** Recombinant HA proteins from **A.** H3 HAs, **B.** H1 HAs or **C.** Zoonotic HAs were tested for binding by HA-specific monoclonal antibodies via ELISA. The binding sites of each antibody is indicated on the HA structures.

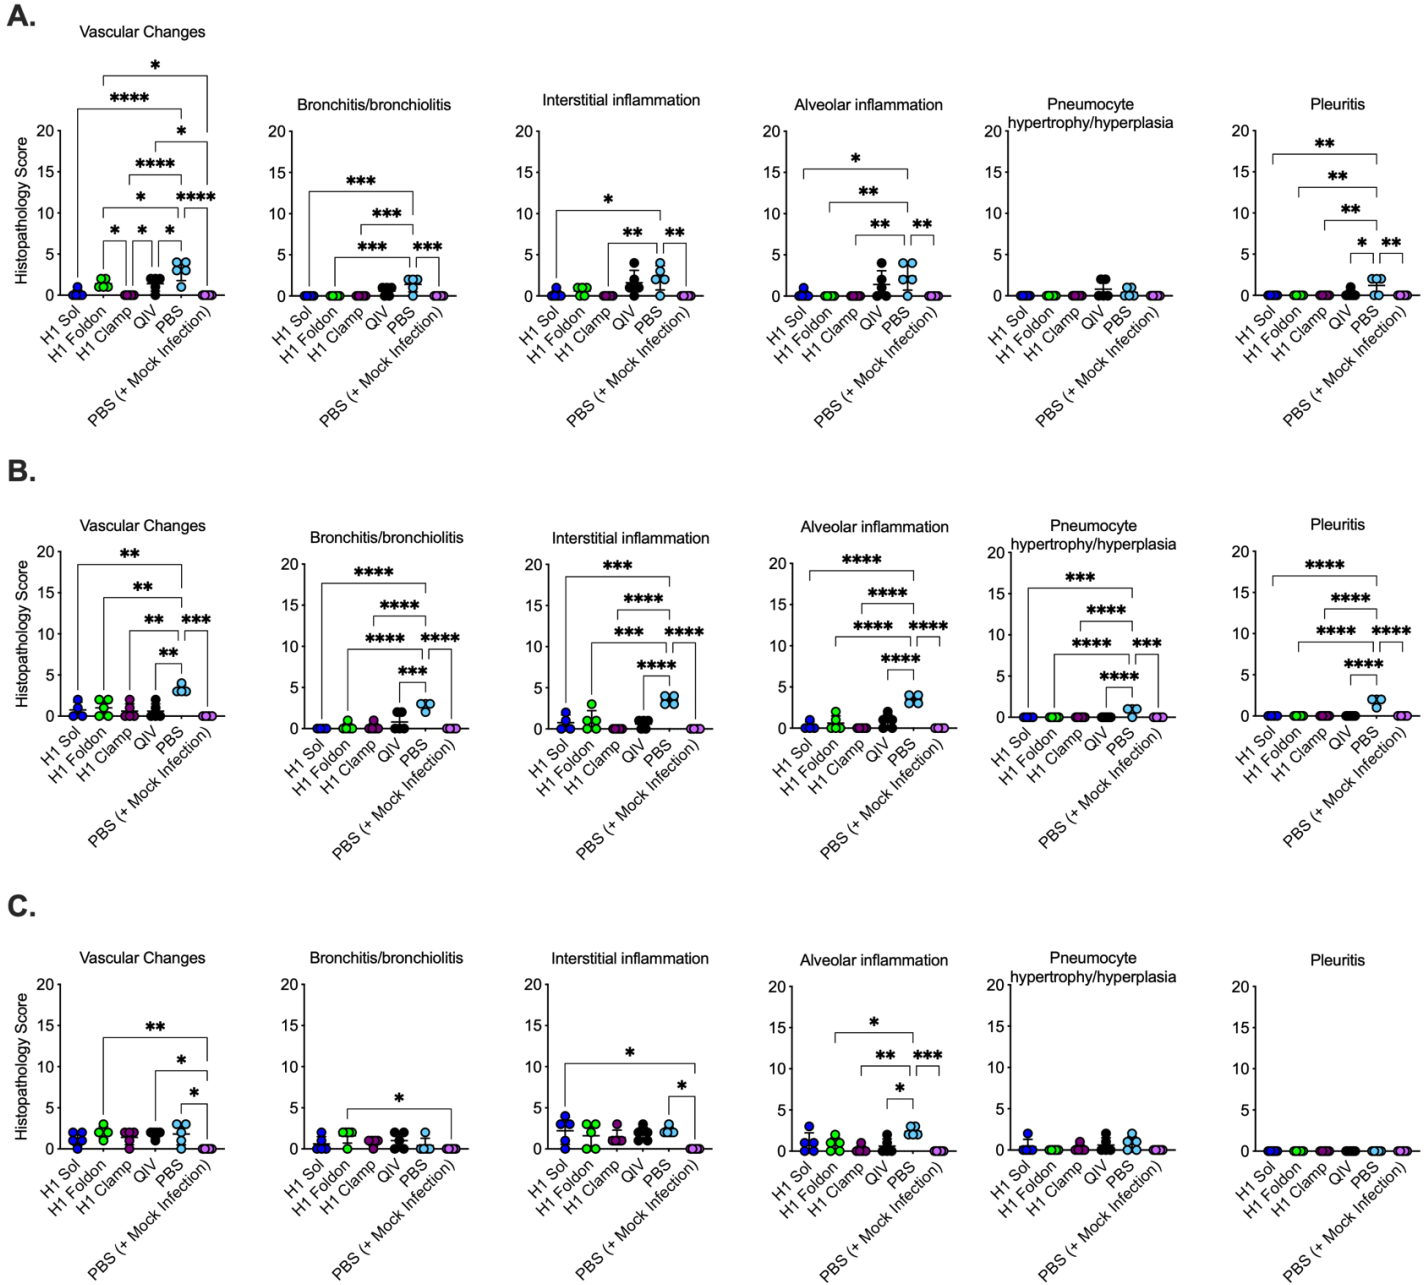

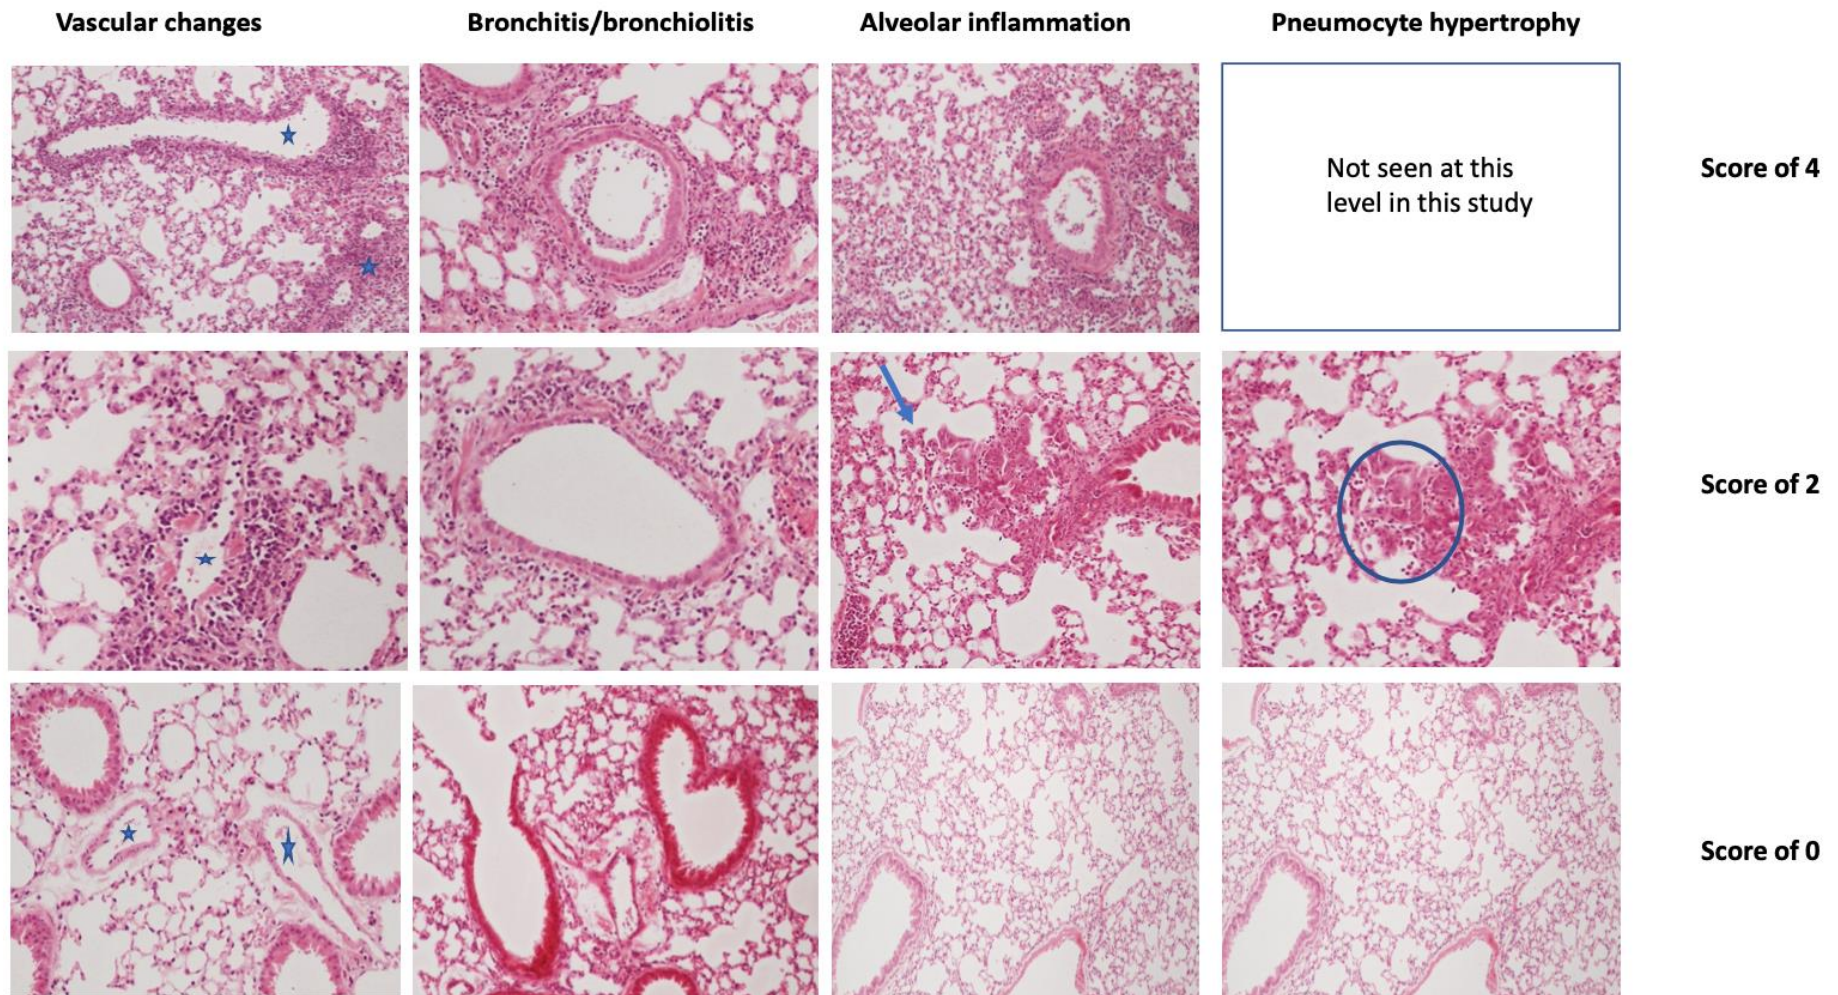

**Supplementary figure 3:** Representative microphotos of the types of pathological changes assessed and the degree of severity, from within normal limits (score of 0) to mild (score of 2) to severe (score of 4). Scores of 1 (subtle/minimal change) and of 3 (moderate change) not shown. Stars indicate pulmonary vessels. The arrow in the right-centre panel indicates an area of mild alveolitis with focal pneumocyte hypertrophy, show in the enlarged microphoto on the right (circled). Hematoxylin & eosin stained sections taken at 40x or 100x magnification.



**Supplementary table 1: Sequences of proteins used in this manuscript.**

*Igκ* signal sequence is in italics, and the Foldon and 6HB domains in bold.

| Virus strain – protein name:                 | Sequence:                                                                                                                                                                                                                                                                                                                                                                                                                                                                                                                                                                                                                                                                                                                                                                                                                                                                                                                                                                                                                                                                                                                                                                                                                                                                                                                                                                                                                                                                                                                                                                                                                                                                                                                                                                                                                                                                                                                                                                                                                                                                                                                                                                                                                                                                                                          |
|----------------------------------------------|--------------------------------------------------------------------------------------------------------------------------------------------------------------------------------------------------------------------------------------------------------------------------------------------------------------------------------------------------------------------------------------------------------------------------------------------------------------------------------------------------------------------------------------------------------------------------------------------------------------------------------------------------------------------------------------------------------------------------------------------------------------------------------------------------------------------------------------------------------------------------------------------------------------------------------------------------------------------------------------------------------------------------------------------------------------------------------------------------------------------------------------------------------------------------------------------------------------------------------------------------------------------------------------------------------------------------------------------------------------------------------------------------------------------------------------------------------------------------------------------------------------------------------------------------------------------------------------------------------------------------------------------------------------------------------------------------------------------------------------------------------------------------------------------------------------------------------------------------------------------------------------------------------------------------------------------------------------------------------------------------------------------------------------------------------------------------------------------------------------------------------------------------------------------------------------------------------------------------------------------------------------------------------------------------------------------|
| A/Switzerland/9715293/2013(H3N2) - H3 Sol    | <p>DNA<br/> <i>ATGAAGACCATCATCGCTCTGTACATACATCCTTTGTCTGGTGTGTTGCCAGAAAGTCCAGGTAATGATAACTCAACAGCTACTCTTTGTCTGGGTTCATCATGCAGTGCCCAACGGCACCATTGTCAAGACCATCACCAACGATCGGATAGAAGTGACCAACGCCACCGAATTGGTGCAGAAGCTCAATCGGAGAGATCTGCGATAGTCCATCAAATTTTGGACGGAGAAAACCTGCACCTTGATAGATGCTTTGGCTGGCGATCCTCAGTGCAGCGGCTTCCAAAACAAGAAAGTGGGACCTTTTGTGGAGCGCTCTAAGGCCATTTCCAAATGGTATCCATACGATGTTCCAGATTATGCCTCCCTGCGGTCACCTGTGCGTAGTAGCGGAACACTGGAGTTTAAACAACGAGAGTTTCAATTTGGGCTGGAGTGACCCAGAACGGCACCAGTTCTTCATGCAGACGAGGGTCAAAATCTTCAATTTTTCTTAGGCTCAACTGCGCTCATCTCAA TAGTAAATACCCAGCTCTTAACGTGACTATGCCTAACAAATGAGCAATTCGACAAAGTTGTACATCTGGGGTGTGCACCATCTGTACAGATAAAAGATCAGATCTTTCTTACGCCAGTCTCCGGCGTA TAACAGTGTCAACTAAGCGCAGTCAGCAGGCTGTGATCCCTAACATCGGATACAGACCTAGGATACGCGACATCCCAAGCCGATCTCCATCTACTGGACTATTGTAACCTGGCGACATCTTCTGAT CAACAGCACCGGCAACCTCATCGCTCCTCGCGGATTTTAAAGTCCGCTCCGGCAAAAGTAGCATTATGAGGTCGCGACACCTATCGGCAAGTGCAAGTCAGAGTGATTACACAAAACGGAAAGCAT TCCCAATGACAAAACCATTCAGAACGTGAACCGCATCACCTATGGCGCTGTCCAAGATACGTGAAGCAGTCTACCTGAAACTGGCCACAGGTATGCGGAACGTGCCGAGAGGCAAAACCCGAGGCAT CTTCCGGGCAATCGCAGGCTTCATCGAGAACGGGTTGGGAAGGCATGGTTCGATGGCTGGTACGGATTAGACATCAGAACAGTGAAGGGAGAGGCCAAGCCGCTGATTGAAAGTCCACCCAGGCAGCCA TCGACCAGATTAACGGCAAGCTGAACAGGTTGATAGGGAACCAATGAAAAGTTTTCATCAAATTTGAGAAGGAGTTTTCTGAGGTTGAGGGCAGGATTCAGGATCTGGAAGGATGTTGGAAGATACT AAGATCGATCTGTGGAGCTATAACGCCGAGCTGTGGTGAACCTGGAAATCAGCACAAATGACCTCACAGATTCTGAGATGAACAACTGTCGAAAAGACTAAGAAAGCAACTAGGGAAGATGC AGAAGATATGGGCAATGGCTGTTCAAATCTATCATAAGTGTGACAATGCTTGTATCGGTTCCATCAGGAACGGCACTTATGACCATGACGCTTACAGGGATGAAGCCCTGAATAACCGGTTTCAGATC AAGGGAGTCGAACTGAAGAGCGGATACAAAAGTGGCTGTGGT<b>ACTTTTCTCTAA</b></i></p> <p>Amino acid<br/> <i>MKTHIALSYILCLVFAQKLPNGDNSTATLCLGHHA VPNGTIVK TITNDRIEVTNATELVQNSSIGEICDSPHQILDGENCTLIDALLGDPQCDGFQNKKWDLFVERSKA YSNCPYDVPDYASLRSLV ASSGTLFENF ESFNWAGVTQNGTSSSRRRGSNSFFSRLNWLTHLNSKYPALNVMPNNEQDFKLYIWGVVHPVTDKQIFLYAQSSGRITVSTKRSQQA VIPNIGYRPRIRDIPSRSIYWTIVKPGDILLINSTGNLIAPRGYFKIRS GKSSIMRSDAPIGKCKSECTTPNGSIPNDKPFQNVNRITYGACPRYVKQSTLKLATGMRNVPERQTRGIFGAIAGFIENGWEGMVDGWYGFRRHQNSEGRGQAADLKSTQAAIDQINGKLNRLIGKTNEKHFHQIEKE FSEVEGRIQDLEKYVEDTKIDLWSYNAELLVALENQHTIDLTDSEMNKLFKFKQLRENAEDMNGCFKFIYHKCDNACIGSIRNGTYDHDVYRDEALNNRFQIKGVELKSGYKDW*</i></p>                                      |
| A/Switzerland/9715293/2013(H3N2) - H3 Foldon | <p>DNA<br/> <i>ATGAAGACCATCATCGCTCTGTACATACATCCTTTGTCTGGTGTGTTGCCAGAAAGTCCAGGTAATGATAACTCAACAGCTACTCTTTGTCTGGGTTCATCATGCAGTGCCCAACGGCACCATTGTCAAGACCATCACCAACGATCGGATAGAAGTGACCAACGCCACCGAATTGGTGCAGAAGCTCAATCGGAGAGATCTGCGATAGTCCATCAAATTTTGGACGGAGAAAACCTGCACCTTGATAGATGCTTTGGCT GGGCGATCCTCAGTGCAGCGGCTTCCAAAACAAGAAAGTGGGACCTTTTGTGGAGCGCTCTAAGGCCATTTCCAAATGGTATCCATACGATGTTCCAGATTATGCCTCCCTGCGGTCACCTGTGCGTAGTA GCGGAAACTGGAGTTTAAACAACGAGAGTTTCAATTTGGGCTGGAGTGACCCAGAACGGCACCAGTTCTTCATGCAGACGAGGGTCAAAATCTTCAATTTTTCTTAGGCTCAACTGGCTACTCATCTCAA TAGTAAATACCCAGCTCTTAACGTGACTATGCCTAACAAATGAGCAATTCGACAAAGTTGATACATCTGGGGTGTGCACCATCTGTACAGATAAAAGATCAGATCTTTCTTACGCCAGTCTCCGGCGTA TAACAGTGTCAACTAAGCGCAGTCAGCAGGCTGTGATCCCTAACATCGGATACAGACCTAGGATACGCGACATCCCAAGCCGATCTCCATCTACTGGACTATTGTAACAACTGGCGACATCTTCTGAT CAACAGCACCGGCAACCTCATCGCTCCTCGCGGATTTTAAAGATCCGCTCCGGCAAAAGTAGCATTATGAGGTTCCGACACCTATCGGCAAGTGAAGTCAGAGTGATTACACCAAACGGAAAGCAT TCCCAATGACAAAACCATTCAGAACGTGAACCGCATCACCTATGGCGCTGTCCAAGATACGTGAAGCAGTCTACCTGAAACTGGCCACAGGTATGCGGAACGTGCCGAGAGGCAAAACCCGAGGCAT CTTCCGGGCAATCGCAGGCTTCATCGAGAACGGGTTGGGAAGGCATGGTTCGATGGCTGGTACGGATTAGACATCAGAACAGTGAAGGGAGAGGCCAAGCCGCTGATTGAAAGTCCACCCAGGCAGCCA TCGACCAGATTAACGGCAAGCTGAACAGGTTGATAGGGAACCAATGAAAAGTTTTCATCAAATTTGAGAAGGAGTTCAGGTTGAGGGCAGGATTCAGGATCTGGAAGGATGTTGGAAGATACT AAGATCGATCTGTGGAGCTATAACGCCGAGCTGTGGTGAACCTGGAGAATCAGCACAAATGACCTCACAGATTCTGAGATGAACAACTGTTGAAAAGACTAAGAAAGCAACTAGGGAAGATGC AGAAGATATGGGCAATGGCTGTTCAAATCTATCATAAGTGTGACAATGCTTGTATCGGTTCCATCAGGAACGGCACTTATGACCATGACGCTTACAGGGATGAAGCCCTGAATAACCGGTTTCAGATC AAGGGAGTCGAACTGAAGAGCGGATACAAAAGTGGCTGTGGT<b>ACTTTTCTCTAA</b></i></p> <p>Amino acid<br/> <i>MKTHIALSYILCLVFAQKLPNGDNSTATLCLGHHA VPNGTIVK TITNDRIEVTNATELVQNSSIGEICDSPHQILDGENCTLIDALLGDPQCDGFQNKKWDLFVERSKA YSNCPYDVPDYASLRSLV ASSGTLFENF ESFNWAGVTQNGTSSSRRRGSNSFFSRLNWLTHLNSKYPALNVMPNNEQDFKLYIWGVVHPVTDKQIFLYAQSSGRITVSTKRSQQA VIPNIGYRPRIRDIPSRSIYWTIVKPGDILLINSTGNLIAPRGYFKIRS GKSSIMRSDAPIGKCKSECTTPNGSIPNDKPFQNVNRITYGACPRYVKQSTLKLATGMRNVPERQTRGIFGAIAGFIENGWEGMVDGWYGFRRHQNSEGRGQAADLKSTQAAIDQINGKLNRLIGKTNEKHFHQIEKE FSEVEGRIQDLEKYVEDTKIDLWSYNAELLVALENQHTIDLTDSEMNKLFKFKQLRENAEDMNGCFKFIYHKCDNACIGSIRNGTYDHDVYRDEALNNRFQIKGVELKSGYKDWGSAIGGYIPEAPRDGQA YVRKDGEWVLLSTFL*</i></p> |
| A/Switzerland/9715293/2013(H3N2) - H3 6HB    | <p>DNA<br/> <i>ATGAAGACCATCATCGCTCTGTACATACATCCTTTGTCTGGTGTGTTGCCAGAAAGTCCAGGTAATGATAACTCAACAGCTACTCTTTGTCTGGGTTCATCATGCAGTGCCCAACGGCACCATTGTCAAGACCATCACCAACGATCGGATAGAAGTGACCAACGCCACCGAATTGGTGCAGAAGCTCAATCGGAGAGATCTGCGATAGTCCATCAAATTTTGGACGGAGAAAACCTGCACCTTGATAGATGCTTTGGCT GGGCGATCCTCAGTGCAGCGGCTTCCAAAACAAGAAAGTGGGACCTTTTGTGGAGCGCTCTAAGGCCATTTCCAAATGGTATCCATACGATGTTCCAGATTATGCCTCCCTGCGGTCACCTGTGCGTAGTA GCGGAAACTGGAGTTTAAACAACGAGAGTTTCAATTTGGGCTGGAGTGACCCAGAACGGCACCAGTTCTTCATGCAGACGAGGGTCAAAATCTTCAATTTTTCTTAGGCTCAACTGGCTACTCATCTCAA TAGTAAATACCCAGCTCTTAACGTGACTATGCCTAACAAATGAGCAATTCGACAAAGTTGATACATCTGGGGTGTGCACCATCTGTACAGATAAAAGATCAGATCTTTCTTACGCCAGTCTCCGGCGTA TAACAGTGTCAACTAAGCGCAGTCAGCAGGCTGTGATCCCTAACATCGGATACAGACCTAGGATACGCGACATCCCAAGCCGATCTCCATCTACTGGACTATTGTAACAACTGGCGACATCTTCTGAT CAACAGCACCGGCAACCTCATCGCTCCTCGCGGATTTTAAAGATCCGCTCCGGCAAAAGTAGCATTATGAGGTTCCGACACCTATCGGCAAGTGAAGTCAGAGTGATTACACCAAACGGAAAGCAT TCCCAATGACAAAACCATTCAGAACGTGAACCGCATCACCTATGGCGCTGTCCAAGATACGTGAAGCAGTCTACCTGAAACTGGCCACAGGTATGCGGAACGTGCCGAGAGGCAAAACCCGAGGCAT CTTCCGGGCAATCGCAGGCTTCATCGAGAACGGGTTGGGAAGGCATGGTTCGATGGCTGGTACGGATTAGACATCAGAACAGTGAAGGGAGAGGCCAAGCCGCTGATTGAAAGTCCACCCAGGCAGCCA TCGACCAGATTAACGGCAAGCTGAACAGGTTGATAGGGAACCAATGAAAAGTTTTCATCAAATTTGAGAAGGAGTTCAGGTTGAGGGCAGGATTCAGGATCTGGAAGGATGTTGGAAGATACT AAGATCGATCTGTGGAGCTATAACGCCGAGCTGTGGTGAACCTGGAGAATCAGCACAAATGACCTCACAGATTCTGAGATGAACAACTGTTGAAAAGACTAAGAAAGCAACTAGGGAAGATGC AGAAGATATGGGCAATGGCTGTTCAAATCTATCATAAGTGTGACAATGCTTGTATCGGTTCCATCAGGAACGGCACTTATGACCATGACGCTTACAGGGATGAAGCCCTGAATAACCGGTTTCAGATC AAGGGAGTCGAACTGAAGAGCGGATACAAAAGTGGCTGTGGT<b>ACTTTTCTCTAA</b></i></p> <p>Amino acid<br/> <i>CAAGAAAAGAAATGAACAAGAAATTATTGGAATAG</i></p>                                                                                                                                                                                                                                                                                                                                                                                                                                                                                                                                                     |

|                                                                 |            |                                                                                                                                                                                                                                                                                                                                                                                                                                                                                                                                                                                                                                                                                                                                                                                                                                                                                                                                                                                                                                                                                                                                                                                                                                                                                                                                                                                                                                                                                                                                                                                                                                                                                                                                                                                                                                                                                                                                          |
|-----------------------------------------------------------------|------------|------------------------------------------------------------------------------------------------------------------------------------------------------------------------------------------------------------------------------------------------------------------------------------------------------------------------------------------------------------------------------------------------------------------------------------------------------------------------------------------------------------------------------------------------------------------------------------------------------------------------------------------------------------------------------------------------------------------------------------------------------------------------------------------------------------------------------------------------------------------------------------------------------------------------------------------------------------------------------------------------------------------------------------------------------------------------------------------------------------------------------------------------------------------------------------------------------------------------------------------------------------------------------------------------------------------------------------------------------------------------------------------------------------------------------------------------------------------------------------------------------------------------------------------------------------------------------------------------------------------------------------------------------------------------------------------------------------------------------------------------------------------------------------------------------------------------------------------------------------------------------------------------------------------------------------------|
|                                                                 | Amino acid | MKTHIALSYILCLVFAQKLPNGDNDSTATLCLGHHA VPNGTIVKTIITNDRIEVNTA TELVYQSSSIEGICDSPHOILDGENTLIDLADLGGPQDCGFQNKKWDLFVFRS KAS YNCYYPYDVPDYASLRSLVASSGTLEFNN<br>ESFNWAGVTQNGTSSSSRRGNSNSSFFSRLNLWHLNLSKYPALNVTMPNNEQDFKLYWGVVHHPVTDKQDQIFLYAQSSSGRITVSKRQQA VIPNIGYRPRIRDIPSRSISYWTIVKPGDKILLNLTGNL IAPRGYFKIRS<br>GKSSMIRSDAIPGKCKSECTPNPNSIPNDKPFQNVNRITYGACPRYVKQSTLKLATGMRVNPERQTRGIFGAIAGFTIENGWEGMVDGWYGFHRQNSEGRRQAADLKSTQAADQINGKLNLTIGKTKNEKFHQIEKE<br>FSEVEGRIQDLEKYVEDTKIDLWSYNAELLVALENQHTIDLTDSEMLNKFEEKQLRENAEDMGNCGCFKHYHKCDNA CIGSIRNGTYDHDVYRDEALNRRFQIKGVELKSKSYKDGSGIVQQQNLLRAIEAQ<br><b>QHLLQLTVWGIKQLQARILAGSGGHTTWMEWDREINTYLSHLSLESQNQKEQELLE*</b>                                                                                                                                                                                                                                                                                                                                                                                                                                                                                                                                                                                                                                                                                                                                                                                                                                                                                                                                                                                                                                                                                                                                                                                                                                                                          |
| A/California/04/2009(H1N1pdm) - H1 Sol                          | DNA        | ATGAAAGTAAAAC TACTGGTCTGTTATGCACATTCGCAACAGCTAACGCCGACACACTTTGTATCGGTTACCATGCCAATAATCCACTGACACCGTGCACACAGTGTGGAAAAGAACGTGCACAGTCA<br>CACACTCAGTCAATCTGCTGGAAAGACAAGCACAACGGCAAGCTGTGCAAGCTGGCGGGAGTGGCACCTTTGCATCTGGGAAAAGTGAATATCGCTGGCTGGATCTGGGCAATCTCGAGTGCGAATCCC<br>TGAGCACCGCCTCTAGCTGGTCTTACATTGTCAAACCTCCTCAAGTGACAACGGGACTTGTACCTCCGGGGACTTCATCGATTACGAAGAATTGCCGTGAGCAGCTGAGCAGCTGAGTTCATTTGAACG<br>CTTTGAGATTTCCCTAAGACCTCCTCCTGGCCCAATCACGACTCCAACAAGGGAGTCACTGCCGCATGTCCCATGTGGAGCAAAATCTTTTACAAAAACCTCATCTGGCTGTCAAGAAAGGAAAC<br>TCATATCCAAAGCTCAGTAAGTCTATATTAACGACAAAGGAAAGGAGGTTCTCGTTCTGTGGGCCATTCCACTCCTCCACACTCCGCAGATCAGCAGTCCCTCTATCAAAACGCCGATACCTATGTGTT<br>TGTCGGGTCATCCCGGTATCCAAAAAATTTAAGCCTGAAAATCGCCATTAGGCCAAAAGGTGCGAGATCAGGAAGGACGCATGAATACTATTGGACTCTTGTGGAGCCTGGCGATAAAGATCACATTCA<br>GGCAACTGGCAACCTGGTGGTTCACAGGTACGCTTTTGCATGGAGCGTAACCGTGAAGTGGTATCATTATCTCTGATACCCTGTGCATGATTGTAACTACTCTGCAAAACCCCTAAGGGAGCTATT<br>AACACTCACTCCCTTTCAAAATATTCATCAATTAATTGGCAATGCCTAAGTATGTTAAATCCCAAGCTCCGCTCGCCACCAGCTGCGCAACATTCATCCATCACAGTCTCGTGGATTGTT<br>GGGGCTATAGCTGGCTTTATAGAGGGCGGATGGACAGGTATGGTTGACGGGTGGTACGGCTACCCACCACGAACGAGGAAAGCGGGTATGCCGCCACTGAAATCAACAGAAACCGTATGCGCCGACTG<br>CGAGATAACCAACAAAGTGAACCTCAGTATAGAAAAGATGAAACACAGATTCACAGCAGTGGTAAAGAGTTTAAACCATCTCGAGAAAAGGATGAGAATCTGAACAAAAAGGTCGACGATGGATTC<br>TGGATTTGGACTTACAATGCAAGCTGCTGGTTCTTCTCGAGAATGAGCGCACTTGAATACAGCTACTAACCTGAAAAACCTCTACGAGAAGGTCCGTTACAGCTGAAGAATAATGCAAAA<br>GATCGGGAACGGGTGTTTTGAATTTATCACAATGCGACAACACCTGCATGGAGTCTGTGAAGAATGGGACTTATGACTACCCTAAGTATTCCGAGGAAGCTAAGCTCAACCGAGAGGATCGACGG<br>GGTCAAGCTTGAAAGCACCCGG                                                                                                                                                                                                                                                                                        |
|                                                                 | Amino acid | MKVLLVLLCTFATANADTL CIGYHANNSTDTVDTVLEKNVTVTHSVNLLDKHNGKLC KLRGVAPLHLGKCNIA GWILGNPECESLSTASSWSYIVETPSSDNGTCYPGDFIDYEELREQLSSVSSFERFEIFPKT<br>SSWPNHDSNKGVTAACPHAGAKSFYKNLIWL VKKGNSYPKLSKSYINDKGEVLVLWGIHHPSTSADQQLYQNA DTYVFGSSRYSKFKPEIAIRPKVRDQEGRMNY YWTLVEPGDKITFEATGNLVVPRY<br>AFAMERNAGSGHIIDTPVHDCNTTCTQTPKGAIN TSLFPQNIHPITIGKPKYVKSTKLRLATGLRNPSIQSRGLFGA IAGFIEGGWTGMVDGWYGYHHQNEQSGSYAADLKSTQNAIDEITNKVNSVIEKMNTQFT<br>AVGKEFNHLEKRIENLNKVVDDGFLDIW TYNAELLVLENERLTDYHDSNVKNLYE KVRSQLKNAKEIGNCGFEFYHKCDNTCMESVKNGT YDYPKYSEEAKLNREEIDGVKLESTR*                                                                                                                                                                                                                                                                                                                                                                                                                                                                                                                                                                                                                                                                                                                                                                                                                                                                                                                                                                                                                                                                                                                                                                                                                                                                                                                                                                             |
| A/California/04/2009(H1N1pdm) - H1 Foldon (Igc signal sequence) | DNA        | <b>ATGGGATGGAGCTGTATCATCCTCTTCTGGTAGCAACAGCTACAGGTGTCCACTCCGAGGACACACTTTGTATCGGTTACCATGCCAATAATCCACTGACACCGTGCACACAGTGTGGAAAAGAACGTCAC</b><br>CAGTCACACTCAGTCAATCTGCTGGAAGACAAGCACAACGGCAAGCTGTGCAAGCTGCGCGGAGTGGCACCTTTGCATCTGGGAAAAGTGAATATCGCTGGCTGGATCTGGGCAATCTGAGTGCG<br>AATCCCTGAGCACCGCCTCTAGCTGGTCTTACATTGTCAAACCTCCTCAAGTGACAACGGGACTTGTACCTCCGGGACTTCATCGATTACGAAGAATTGCCGTGAGCAGCTGAGCAGCTGAGTTCATT<br>TGAAACGCTTTGAGATTTTCCCTAAGACCTCCTCCTGGCCCAATCAGCACTCAACAAAGGGAGTCACTGCCGCATGTCCCATGTGGAGCAAAATCTTTTACAAAAACCTCATCTGGCTTGTCA<br>CAAAAACCTCATCTGGCTTGTCAAGAAAAGGAAACTCATAATCAAAAGCTCATAATTAACGACAAAGGAAAGGAGTTCATTAACGACAAAGGAAAGGAGTTCCTGTTCTGTGGGGCAATCACCATCCTCCACATCCGCAGATCAG<br>CAGTCCCTCTATCAAAACGCCGATACCTATGTGTTTGTCCGGTCAATCCCGGATTTCAAAAAAATTTAAGCCTGAAATCGCCATTAGGCCAAAGGTGCGAGATCAGGAAGGACGCATGAATTAATATTGGA<br>CTCTGTGGAGCCTGGCGATAAGATCACAATTCGAGGCAACTGGCAACTGGTGGTTCAGGATACGCTTTTGCCATGGAGCGTAAACGCTGGAAGTGGTATCATTATCTGATACCCCTGTGCATGATTGT<br>AACACTACTGTCAAAGGTCGACGATGGATTCTGGATATTTGGACTTCAACATGACAGTCTGCTGTTCTCTCGAGAATGAGCGCACTTGGGATTATACAGCTCTAACGCTGAAAAACCTACGAGAA<br>CAACATCCATCCATACAGTCTGTGGATTGTTGGGGCTATAGCTGGCTTTATAGAGGGCGGATGGACAGGTATGGTGTACCGGGTGTACGGCTACCACCACGAAACGAACAGGGAAGCGGGTATGC<br>CGCCGACTTGAATCAACAGACGCTATCGACAGATAACCAACAAAGTGAACCTCAGTCATAGAAAAGATGAACACACAGTTCACAGCAGTGGTAAAGGATTTAACCTATCCAGAAAAGGATTTG<br>AGAACTGAACAAAAAGGTCGACGATGGATTCTGGATATTTGGACTTCAACATGACAGTCTGCTGTTCTCTCGAGAATGAGCGCACTTGGGATTATACAGCTCTAACGCTGAAAAACCTACGAGAA<br>GGTCCGTTACAGCTGAAGAAATATGCAAAAGAGATCGGGAACGGGTGTTTTGAATTTTATCACAATGCGACAACACCTGCATGGAGTCTGTGAAGAATGGGACTTATGACTACCCTAAGTATTCCGA<br>GGAAGCTAAGCTCAACCGAGAGGATCGACGGGTCAAGCTTGAAGCACCCGGGGTTCAGCAAT <b>TGGTGGCTACATTCAGAGGCCCCACAGATGGACAAGCATACGTGAGAAAAGGATGGC</b><br><b>GAATGGGTACTCTTGAGCACTTTTCTGTAA</b>                                                                                                          |
|                                                                 | Amino acid | <b>MGWSCILFLVATATGVHSED</b> TL CIGYHANNSTDTVDTVLEKNVTVTHSVNLLDKHNGKLC KLRGVAPLHLGKCNIA GWILGNPECESLSTASSWSYIVETPSSDNGTCYPGDFIDYEELREQLSSVSSFERFEIFPK<br>TSSWPNHDSNKGVTAACPHAGAKSFYKNLIWL VKKGNSYPKLSKSYINDKGEVLVLWGIHHPSTSADQQLYQNA DTYVFGSSRYSKFKPEIAIRPKVRDQEGRMNY YWTLVEPGDKITFEATGNLVVPRY<br>AFAMERNAGSGHIIDTPVHDCNTTCTQTPKGAIN TSLFPQNIHPITIGKPKYVKSTKLRLATGLRNPSIQSRGLFGA IAGFIEGGWTGMVDGWYGYHHQNEQSGSYAADLKSTQNAIDEITNKVNSVIEKMNTQFT<br>AVGKEFNHLEKRIENLNKVVDDGFLDIW TYNAELLVLENERLTDYHDSNVKNLYE KVRSQLKNAKEIGNCGFEFYHKCDNTCMESVKNGT YDYPKYSEEAKLNREEIDGVKLESTRGGSAIGGYIPEAPRD<br><b>GQAYVRKDGEWVLLSTFL*</b>                                                                                                                                                                                                                                                                                                                                                                                                                                                                                                                                                                                                                                                                                                                                                                                                                                                                                                                                                                                                                                                                                                                                                                                                                                                                                                                      |
| A/California/04/2009(H1N1pdm) - H1 6HB (Igc signal sequence)    | DNA        | <b>ATGGGATGGAGCTGTATCATCCTCTTCTGGTAGCAACAGCTACAGGTGTCCACTCCGAGGACACACTTTGTATCGGTTACCATGCCAATAATCCACTGACACCGTGCACACAGTGTGGAAAAGAACGTCAC</b><br>CAGTCACACTCAGTCAATCTGCTGGAAGACAAGCACAACGGCAAGCTGTGCAAGCTGCGCGGAGTGGCACCTTTGCATCTGGGAAAAGTGAATATCGCTGGCTGGATCTGGGCAATCTGAGTGCG<br>AATCCCTGAGCACCGCCTCTAGCTGGTCTTACATTGTCAAACCTCCTCAAGTGACAACGGGACTTGTACCTCCGGGACTTCATCGATTACGAAGAATTGCCGTGAGCAGCTGAGCAGCTGAGTTCATT<br>TGAAACGCTTTGAGATTTTCCCTAAGACCTCCTCCTGGCCCAATCAGCACTCAACAAAGGGAGTCACTGCCGCATGTCCCATGTGGAGCAAAATCTTTTACAAAAACCTCATCTGGCTTGTCAAGAA<br>GAAAACCTATATCCAAAGCTCAGTAAGTCTTATATTAACGACAAAGGAAAGGAGTTCCTGTTCTGTGGGGCAATCACCATCTCCACATCCCGAGATCAGCAGTCCCTCTATCAAAAACCGCCTACCT<br>ATGTGTTTGTCCGGTCAATCCCGGATTTCAAAAAAATTTAAGCCTGAAATCGCCATTAGGCCAAAGGTGCGAGATCAGGAAGGACGCATGAATTAATTAAGTACTATTGGACTCTTGTGGAGCCTGGCGATAAGATC<br>ATTCGAGGCAACTGGCAACCTGGTGGTTCACAGGTACGCTTTTGCCATGGAGCGTAAACGCTGGAAGTGGTATCATTATCTGTGATACCCCTGTGCATGATTGTAACACTACCTGTCAAAACCCCTAAGGGA<br>GCTATTAACACTCCTCCCTTTCAAAAATATTCACAAATTAATTGGCAATGTCCTAAGTATGTTAAATCCCAAGTCCGCTCGCCACCGGACTCGCAACACTCCATCCATACAGTCTGCTGG<br>ATTGTTTGGGGCTATAGCTGGCTTATAGAGGGCGGATGGACAGGTATGGTGTACCGGTGTACGGCTACCACCACGAAACGAACAGGGAAGCGGGTATGCCCGCAGCTTGAATCAACAGAAACG<br>CTATCGACGAGATAACCAACAAAGTGAACCTCAGTCATAGAAAAGATGAACACACAGTTCACAGCAGTGGTAAAGGATTTAACCTCTCGAGAAAAGGATTGAGAATCTGAACAAAAAGGTCGACGAT<br>GGATTCTGGATATTTGGACTTACAATGCAGAGCTGCTGGTTCTTCTCGAGAATGAGCGCACTGGAATATACAGCTTAAACGCTGAAAAACCTCTACGAGAAGGTCCGTTACAGCTGAAGAAATAAG<br>CAAAAGAGATCGGGAACGGGTGTTTTGAATTTTATCACAATGCGACAACACCTGCATGGAGTCTGTGAAGAATGGGACTTATGACTACCCTAAGTATTCCGAGGAAGCTAAGCTCAACCGAGAGGAGA<br>TCGACGGGTCAAGCTTGAAGCACCCGGGGCTGGT <b>GAATCTGTGGAAGTCAACGACGATCGAGTCCAGTCCAGTCAAGTGAAGTCAAGGATCCAGAACCA</b><br><b>CAGCTGAGGCCAGAAATCTCGTGGCGGATCTGGCGGCATACCCTGGATGGAATGGGACAGAGAGATCAACAACTACACCAGCCTGATCCACAGCTGATTGAGGAATCCAGAAACCA</b><br><b>CAGAGAGAAGATGAGCAAGAGCTGCTCGAGTAA</b> |
|                                                                 | Amino acid | <b>MGWSCILFLVATATGVHSED</b> TL CIGYHANNSTDTVDTVLEKNVTVTHSVNLLDKHNGKLC KLRGVAPLHLGKCNIA GWILGNPECESLSTASSWSYIVETPSSDNGTCYPGDFIDYEELREQLSSVSSFERFEIFPK<br>TSSWPNHDSNKGVTAACPHAGAKSFYKNLIWL VKKGNSYPKLSKSYINDKGEVLVLWGIHHPSTSADQQLYQNA DTYVFGSSRYSKFKPEIAIRPKVRDQEGRMNY YWTLVEPGDKITFEATGNLVVPRY<br>AFAMERNAGSGHIIDTPVHDCNTTCTQTPKGAIN TSLFPQNIHPITIGKPKYVKSTKLRLATGLRNPSIQSRGLFGA IAGFIEGGWTGMVDGWYGYHHQNEQSGSYAADLKSTQNAIDEITNKVNSVIEKMNTQFT                                                                                                                                                                                                                                                                                                                                                                                                                                                                                                                                                                                                                                                                                                                                                                                                                                                                                                                                                                                                                                                                                                                                                                                                                                                                                                                                                                                                                                                                                              |

|                                                        |            |                                                                                                                                                                                                                                                                                                                                                                                                                                                                                                                                                                                                                                                                                                                                                                                                                                                                                                                                                                                                                                                                                                                                                                                                                                                                                                                                                                                                                                                                                                                                                                                                                                                                                                                                                                                                                |
|--------------------------------------------------------|------------|----------------------------------------------------------------------------------------------------------------------------------------------------------------------------------------------------------------------------------------------------------------------------------------------------------------------------------------------------------------------------------------------------------------------------------------------------------------------------------------------------------------------------------------------------------------------------------------------------------------------------------------------------------------------------------------------------------------------------------------------------------------------------------------------------------------------------------------------------------------------------------------------------------------------------------------------------------------------------------------------------------------------------------------------------------------------------------------------------------------------------------------------------------------------------------------------------------------------------------------------------------------------------------------------------------------------------------------------------------------------------------------------------------------------------------------------------------------------------------------------------------------------------------------------------------------------------------------------------------------------------------------------------------------------------------------------------------------------------------------------------------------------------------------------------------------|
|                                                        |            | AVGKEFNHLEKRIENLNKKVDDGFLDIWYNAELLVLENERLTDYHDSNVKNLYEVRSQLKNNAKEIGNGCFEFYHKDCDNTCMESVKNGTDYDPKYSEEAKLNREEIDGVKLESTRGGSGIVQQNNLLR<br><b>AIEAQHLLQLTVWGKQLQARILAGSGGTTWMEWDREINNYTSLIHSLEESQNOQEKNEQELLE*</b>                                                                                                                                                                                                                                                                                                                                                                                                                                                                                                                                                                                                                                                                                                                                                                                                                                                                                                                                                                                                                                                                                                                                                                                                                                                                                                                                                                                                                                                                                                                                                                                                   |
| A/Vietnam/1202/2004(H5N1) - H5 Sol                     | DNA        | ATGGAACGGATCGTGTCTGCCCATCGTGTCCCTCGTGAAGTCCGACAGATCGATCGATCCACCGCAACAACCTCCACCGAACAGGTGGACACCATCATGGAAAAAGACGTGACCGTGACCCACGCGCCAGGACATTCGAAAAAGACCCACAACGGCAAGCTGTGCGACTGGACGCGCTGAAAGCCCTGTATCCTGAGAGACTGTTCTGTGGCCGGCTGGCTGCTGGGCAACCCATATGTGGCAGGATTCACAACTGCCCGAGTGGTCTACATCGTGGAAAAGGCCAACCCCTGTGAACGACTGTGTACCCCGGACTTCAACGACTACGAGGAATGAAACATCTGTCTGCCGATCAACCATTCGAGAAGATCCAGATTATCCCAAGTCTCTGGTCTCCACGAGGCTTCTCTGGGGTGTCTCCGATGTCCATAACAGGGCAAGTCCAGCTTCTCCGGAACGTCGTGTGGTGATCAAGAAGAACTCCACCTACCCACCATCAAGCGGTCTACAAACAACCAACCAAGGAAGATCTGCTGGTGTGTGGGGCATCCACCACCTAATGATGCCGCGAGCAGACCAAGCTGTACCAAGAACCCACCACTACATCTCCGTGGCACCTCCACCTGAACCAAGCGGCTGGTGCCTAGAATCGCCACCCGCTCAAAGTGAACGGCCAGTCCGCGAGAATGAAATTTTTCTGGACCATCTCGGGCCAACGACGCCATCAACTTCGAGTCCAACGGCAACTTATCGCCCCGAGTACGCTACAAGATCGTGAAGAAGGGCGACTCTACCATCATGAAGTCTGAGCTGGAATACGGCAACTGCAACGCCAAGTCCAGACCCCATGGGGCCATCAATTCCTCATGCCCTTCCACAACATCCACCCCTGACCATCGGCGAGTGCCCAAATACGTGAAGTCTAACAGACTGGTGTGGCACCGGCTCGGAACTCTCCACGCGGAGCGGAGAAAGAAAGAAAGCGGGCCGTGTTGGCGCTATCGCCGGCTTTATTGAGGGCGGCTGGCAGGGCATGGTGGACGGTGGTACGGCTACCATCACTCAACGAGCAGGGGCTCTGGCTACGCGCCGACAAAAGATCCACCAAAAAGCCATCGACGGCGTACCAACAAGTGAAGTCCATCATGACAAGATGAACACCCAGTTCGAGGCCGTGGGCAGAGAGTTCACCAACCTGGAACGGCGGATCGAGAACCTGAAACAAGAAATGGAGATGGCTTCTGGACGTGTGGACCTACAACGCGGAGTCTGTGTGTGTGAAGAAACAGGCGGACCCCTGGACTTCCACACTCAACCTGTACGCAAAAGTGGCGGCTGAGCAAAAGTGGGCAACGGCTGCTTCCAGTTCTACCAAAAGTGGCACAACGAGTCAAGTGAAGTCCAGTACGCAAAAGTGGGCGCAGCTGCGGGAAGAGATCAGCGGAGTGAAGCTGGAATCCATCCGCTAA                                                                                                                                                                                                                                                                                  |
|                                                        | Amino acid | MERIVLLFAIVSLVKSQDQICGYHANNSTEQVDTIMEKNVTVTHAQDILEKTHNGKLCSDLGKPLILRDCSVAGWLLGNPMCDEFINVPEWSYIVEKANPVDNLCYPGDFNDYEELKHLISRINHFQIHPKSS<br>WSSHEASLVSSAPYQKSSFFRNVVWLIIKKNSTYPTIKRSYNNTNQEDLLVWGIHPNDAAEQTKLYQNPTTYISVGTSTLNQLRVPRIATRSKVNQSGRMEFFWTILRPNDAINFESNGNFIPEYAYKIVK<br>KGDSTIMKSELEYGNCAKQTPMGAISMPFNIHPLTIGCEPKYVKNRNLVLAATGLRNSPQRERRRRKRLFGAIAFGIEGGWQGMVDGWYGYHHSNEQGSYAADKESTQKAIDGVTNKNVSIIDKMNTQ<br>FEAVGREFNLERRIENLNKKMEDGFLDVWYNAELLVLMENERTLDFHDSNVKNLYDKVRLQLRDNKELGNGCFEYHCKDNECMESVRNGTYDYPOYSEEARKKREISGVKLESIG*                                                                                                                                                                                                                                                                                                                                                                                                                                                                                                                                                                                                                                                                                                                                                                                                                                                                                                                                                                                                                                                                                                                                                                                                                                                                       |
| A/Vietnam/1202/2004(H5N1) - H5 6HB                     | DNA        | ATGGAACGGATCGTGTCTGTGTCGCCATCGTGTCCCTCGTGAAGTCCGACAGATCGATCGGCTACCACGCCACAACCTCCACCGAACAGGTGGACACCATCATGGAAAAAGACGTGACCGTGACCCACGCGCCAGGACATTCGAAAAAGACCCACAACGGCAAGCTGTGCGACTGGACGCGCTGAAAGCCCTGTATCCTGAGAGACTGTTCTGTGGCCGGCTGGCTGCTGGGCAACCCATATGTGGCAGGATTCATCAACGTGCCCGAGTGGTCTACATCGTGGAAAAGGCCAACCCGTGAAGCAGCTGTGCTACCCCGGCGACTTCAACGACTACGAGGAATGAAACATCTGTCTGCCGGATCAACCAATTCGAGAAGATCCAGATTATCCCAAGTCTCTGGTCTCCACGAGGCTTCTCTGGCGGTGTCTCCGATGTCCATAACAGGGCAAGTCCAGCTTCTCCGGAACGTCGTGTGGTGATCAAGAAGAACTCCACCTACCCACCATCAAGCGGCTCAACAACAACCAACCAAGGAAGATCTGTGGTGTGGGGCATCCACCCATAATGATGCCCGGAGCAGCAAGCTGTACCAAGCTTCCAGCAACCCACCTACATCTCCGTGGCACCTCCACCTGAACCAAGCGGCTGGTGCCTAGAATCGCCACCCGCTCAAAGTGAACGGCCAGTCCGCGAGAATGAAATTTTTCTGGACCATCTCGGGCCAACGACGCCATCAACTTCGAGTCCAACGGCAACTTATCGCCCCGAGTACGCTACAAGATCGTGAAGAAGGGCGACTCTACCATCATGAAGTCTGAGCTGGAATACGGCAACTGCAACGCCAAGTCCAGCAACCCCATGGGGCCATCAATTCCTCATGCCCTTCCACAACATCCACCCCTGACCATCGGCGAGTGGCCAAATACGTGAAGTCAACAGACTGGTGTGCCACCGGCTCGGAACTTCCCCAGCGCAGCGGAGAAAGAAAGCGGGGCTGTTGGCGCTATCGCCGGCTTTATTGAGGGCGGCTGGCAGGGCATGGTGGACGGTGGTACGGCTACCATCACTCAACGAGCAGGGCTCTGGCTACGCGCCGACAAAAGATCCACCAAAAAGCCATCGACGGCGTGACCAACAAGTGAAGTCCATCATGACAAGATGAACACCCAGTTCGAGGCCGTGGGCAGAGAGTTCACCAACCTGGAACGGCGGATCGAGAACCTGAAACAAGAAATGGAAGTGGCTTCTGGACGTGTGGACTCAACCGCGAGCTGTGTGTGTGTGAAGAAACAGCGGACCTGGAAGTCCAGCTTCCAGCTCAACGAGTGAAGAACCTGTACGCAAAAAGTGGCGCTGCAAGTGGGACAAAGTGGGCAACGGCTGCTTCCAGTTCTACCAAAAGTGGCACAACGAGTGAAGTCCGTCGCGGAACGGCACCTACGACTACCCCGGACTCTGAGGAACCCCGGCTGAAGCGGGAAGATCAGCGGAGTGAAGCTGGAATCCATCGCCGGTGGCTGTGATAGTGCACGAGCAACAATTTGAGGGGCTATTGAGGCGCAACAGCATCTGTGCAACTCGCTGGGGCATCAAGCAGCTCCAAGCAAGATCTAGCTGGTGGCTCCGCGGCTCACAGCTGAGTGGAGTGGGACAGGAAATTAACAATTAACAAGCTTAATACTCTTAATTGAAGAACTCGCAAAACCAAGCAAGAAATGAACAAGAAATATTGGAATAG  |
|                                                        | Amino acid | MERIVLLFAIVSLVKSQDQICGYHANNSTEQVDTIMEKNVTVTHAQDILEKTHNGKLCSDLGKPLILRDCSVAGWLLGNPMCDEFINVPEWSYIVEKANPVDNLCYPGDFNDYEELKHLISRINHFQIHPKSS<br>WSSHEASLVSSAPYQKSSFFRNVVWLIIKKNSTYPTIKRSYNNTNQEDLLVWGIHPNDAAEQTKLYQNPTTYISVGTSTLNQLRVPRIATRSKVNQSGRMEFFWTILRPNDAINFESNGNFIPEYAYKIVK<br>KGDSTIMKSELEYGNCAKQTPMGAISMPFNIHPLTIGCEPKYVKNRNLVLAATGLRNSPQRERRRRKRLFGAIAFGIEGGWQGMVDGWYGYHHSNEQGSYAADKESTQKAIDGVTNKNVSIIDKMNTQ<br>FEAVGREFNLERRIENLNKKMEDGFLDVWYNAELLVLMENERTLDFHDSNVKNLYDKVRLQLRDNKELGNGCFEYHCKDNECMESVRNGTYDYPOYSEEARKKREISGVKLESIGGGSGIVQQNNLL<br><b>RAIEAQHLLQLTVWGKQLQARILAGSGGHTTWMEWDREINNYTSLIHSLEESQNOQEKNEQELLE*</b>                                                                                                                                                                                                                                                                                                                                                                                                                                                                                                                                                                                                                                                                                                                                                                                                                                                                                                                                                                                                                                                                                                                                                                               |
| A/Shanghai01/2014(H7N9) - H7 6HB (Igk signal sequence) | DNA        | ATGGGATGGAGCTGTATCATCTCTTCTTGGTAGCAACAGTACAGGTTGCCACTCCGAGGACAAAATTTGCCCTGGGACACCATGGCAGTGTAGTAATGGAACAAAAGGTCAACACCCCTGACTGAGCGAGGAGTCCAGGTGGTGAACGCAACAGAAACAGTTGAGAGAACCAATATTCCTGCATCTGCTCCAAAAGGCGACAGTGAATCTTGGGCACTATCGGACAGTGTGGACTTCTGGGCACTATCAAGGCCCTCCCCAGTGTGACAGTTCTGGGATTCAGTGCCGATCTGATTATCGAAAAGCGGAGAAGGCGAGCGATGTGTATCTCGAAAAGTTCGTGAACGAAGAGGCTTGAAGACAGATACTAGGGAATCTGGCGGGATCGACAAAAGAGCCATGGGTTTACCTATCCGGGATCAGGACTAACGGGGCCACTCAGCATGCCCGGCTCCGGCAGTCAATTTATGCTGAGATGAAATGGCTGTGAGTAACACAGACAACCGTCTTTCCCAATGACTAAGTCTCAAAAACACCCGCAAACTCTCTGCCTTATTGTGGGCATTCATCACAGACCAAGCTCTACGGGTCCGGCAATAAAGTTGGTGACAGTGCTCTCCAACTACCAGCAGAGCTTCTGTCCTCTCCCGGAGCAAGGCCCAAGTAAACGGGCTTAGCGGGCAATGACTTCCACTGGTGTGATGCTGAAATCCCAATGACACCGTCACTATTAGCTTCAATGGGGCTTTCATAGCCCCAGAGCCGCACTCTTTTGGCGGCAAGTCTATGGGCATCCAGTCCGGTGTCCAGGTGGATGCAAACTCGGAGGGCGACTGTTACCCTCTGGCGGTACCAATATCAACTATCCAACTGGCCTTCCAGAACATCGATCCCGCGCTCGGAAATGCCAGATACGTGAAGCAGGCTTCTGCTTCTGCCACTGGTATGAAGAATGTCCAGAAATTCCTAAAGGCCGGGTCTGTTCGGCCATCGCAGGCTTTCATGAGAACGGATGGGAGGACTGATCGACGGTGTGGTACGGCTTCAGACACCAGAACGCAAGGAGGAGAGGACAGCAGCGGACTACAAAAGTACTCAGTCTGCCATCGACAGATCAGAGAAAATGAAACCGCTCATCGAAAACAAATCAGCAATTTGAACTCATAGATAACGAGTTCAACGAGGTTGAGAAAACAGATCGGTAAACGTGATAAACTGGACAGACAGCAGCAGTCCGAGGTGTGTCCTATAATCGAGAGCTCCTGTCGCAATGGAGAATCAGCATACCATGATCTGGCAGATAGTGAATGGATAAGTGTACGAAAAGGTTCAAGAGACAGCTCCGGGAAATCGACAGGAAGATGGAACCCGTTGTTTTGAAATATCCAAAATCGGATGATGATTCATGGCTAGCATCCGAAATAACACTTACGACATCCAAGTACGGAAGAAAGCTATCGCAACCTGATCCAGACCTGAAACTTCTAGCGGTTACAAAGACGTGATACTGGCGGCTCGGAACTCGGACAGCAGAAACCTGTAGAGACTCGGCGGAGCAGCATCTGCTGCACTGACCGGTGAGCCATGAAAGCGTGCAGGCCAAGTTCTCGCTGGCGGATCTGGCGCCATACCACCTGGATGGAATGGGACAGAGAGATCAACAACCTACACCAGCCTGATCCACAGCCTGATTGAGGAATCCCAAGAACCAAGAGAGAAATGAGCAAGAGCTGCTCGAGTAA |
|                                                        | Amino acid | MGWSCHLFLVATATGVHSEDKICLGHHAHSVNGTKVNTLTERGVEVVNATETVERTNIPRICSKGKRTVDLGCQGLLGTITGPPQCDQFLFESADLIERREGSDVCPYKGFVNEALRQILRESGGIDKEAMGFYSG<br>IRTNGATSARRSSFSYAEKMWLLSNTDNAFFQMTKSYKNTKRSALIVWGIHHSVSTAETKLYGSGNKLVTGSSNYQQSFVPSGAPQVNLGSRIDFWLMLNPNNDTVTFNFGAFIAPDRASFLRGLK<br>SMIGQSGVQDANECGDYHSGGTIISNLPFNIDSRVAGKCPRYVKQRSLLATGMKNVPEIKPGRFLFGAIAFIENGWELIDGWYGFRHQNAQGEHTAADYKSTQSALDIQTLKLNRIEKNVQFELIDNE<br>FNEVEKQIGNVINWTRDSITEVWSYNAELLVAMENQHTIDLADSEMDKLYERVKRQLRENAEEDTGCFEIFHKDDDCMASIRNNTYDHSKYREEMQNRQIQIDPVKLSYKDVILGGSGIVQQNNLLRAI<br><b>EAQHLLQLTVWGKQLQARILAGSGGHTTWMEWDREINNYTSLIHSLEESQNOQEKNEQELLE*</b>                                                                                                                                                                                                                                                                                                                                                                                                                                                                                                                                                                                                                                                                                                                                                                                                                                                                                                                                                                                                                                                                                                                                                                                  |

|                                                                            |               |                                                                                                                                                                                                                                                                                                                                                                                                                                                                                                                                                                                                                                                                                                                                                                                                                                                                                                                                                                                                                                                                                                                                                                                                                                                                                                                                                                                                                                                                                                                                                                                                                                                                                                                                                                                                                                                                                                                                          |
|----------------------------------------------------------------------------|---------------|------------------------------------------------------------------------------------------------------------------------------------------------------------------------------------------------------------------------------------------------------------------------------------------------------------------------------------------------------------------------------------------------------------------------------------------------------------------------------------------------------------------------------------------------------------------------------------------------------------------------------------------------------------------------------------------------------------------------------------------------------------------------------------------------------------------------------------------------------------------------------------------------------------------------------------------------------------------------------------------------------------------------------------------------------------------------------------------------------------------------------------------------------------------------------------------------------------------------------------------------------------------------------------------------------------------------------------------------------------------------------------------------------------------------------------------------------------------------------------------------------------------------------------------------------------------------------------------------------------------------------------------------------------------------------------------------------------------------------------------------------------------------------------------------------------------------------------------------------------------------------------------------------------------------------------------|
| A/Chicken/Quind<br>ao/020/2014(H9N2<br>) - H9 6HB (Igk<br>signal sequence) | DNA           | ATGGGATGGAGCTGTATCATCTCTTCTTGGTAGCAACAGTACAGGTGTCCACTCCGAGGACAAAATCTGCATTGGATATCAGAGTACCACTCCACCGAGACCGTGGATACCTTGACCGAAAACAACGTGC<br>CTGTCACCCACGCTAAAGAGCTGCTGCACACTGAGCACAATGGCATGCTGTGTGCCACTAGCCTGGGCCAGCCACTCGTCTGGATACCTGCACCATAGAAGGCCTATTTACGGTAATCCATCTCGGA<br>TCTCAGCCTGGAAGGTCCGGGAATGGAGCTATATTGTCGAACGGCCATCTGCCGTGAACGGTCTGTGCTATCCCGGGAACGTTGAAAACCTGGAAAGGCTTCGTAGCTTGTTCAGTGCTAGGTCTTAT<br>CAGAGAATCCAGATTTTCCAGACACCATCTGGAACGTCAGCTATGATGGGACCAGTAAATGCCTGTAGTGGCTCTTTTATCGCTCTATCAGGTGGCTTACACGCAAAAATGGAGATTACCCAATTCAG<br>ACGCCAGTACACTAACAATCAAGGGAAGAATATACTGTTTATGTGGGGCATCAACCAACCTACCAATCAGACCCTCAGCGTGACCTTACACAAGAAGTACACCACCCTAGCGTGGCAACCGAAG<br>AGATCAACAGAAATTTCAAGCCTCTGATCGGCCACGGCCTCTGGTCAACGGGCTGATGGGGCGAATTGACTACTATTGGTCAGTACTCAAGCCCGCCAGACTTTGAGGATTAATCTGATGGTAATTT<br>GATCGCCCTTGGTATGGACACATCTTGTCTGGCGAGTCCACGGTCCGATTCTGAAAACCTGATTTGAAGAGGGGATCTTGCACCGTGCAGTGCCAAACAGAAAAAGGCGGCCTCAACACCACACTTCC<br>ATTCCAAAACGTCAGTAAGTATGCTTTTGGAAACTGCTCCAAGTATATTGGGATCAAGTCACTGAAGTTGGCAGTCGGACTGCGCAACGTCCTAGCCGGTCCAGTAGGGGACTGTTCCGGTCTATCGCC<br>GGTTTCATCGAGGGCGGCTGGTCCGGTCTGGTGGCCGGATGGTACGGCTTTCAGCATAGTAATGATCAGGGGGTCCGATGGCAGCCGACAGAGACTCCACCCAGAAGGCTATCGATAAAATCACAAAGC<br>AAGGTGAACAATATTGTAGACAAAATGAACAAGCAGTACGAGATTATCGATCAGAGTTTCAGCGAGGTCGAGACCCGCTGAACATGATTAATAACAAAATAGACGACCAGATCCAGGACATTTGGGC<br>ATACAACGCAGAGCTTCTGGTGTCTCTGGAGAATCAGAAAGCCCTCGATGAGCAGCAGCCAAACGTTAATAACCTGTATAATAAGGTGAAACGGGCCTTGGGAAGCAACGCCGTGGAGGACGGCAAGG<br>GCTGCTTTGAGCTTTACCATAAATCGCATGACCAGTGCATGAAAAAATCAGGAACGGGACATACAACCGTAGAAAAGTACCAAGAGGAGTCTAAACTTGAGAGGCAGAAAAATAGAGGGCCTAAACTG<br>GAGAGCGAAGGAAGTACAAGATACTCGGCGGGTCTGGTATAGTGCAGCAGCAGAAACAATTTGCTGAGGGCTATTGAGGCGCAACAGCATCTGTTGCAACTCACAGTCTGGGGCATCAAGCAGC<br>TCCAAGCAAGAAATCTAGCTGGTGGCTCCGGCGGTTCACACGACCTGGATGGAGTGGGACAGAGAAATTAACAATTAACAAGCTTAATACACTCCTTAATTGAAGAAATCGCAAAACAGCAA<br>GAAAAGATGAACAAGAATTATTGGAATAG |
|                                                                            | Amino<br>acid | MGWSCILFLVATATGVHSEDKICIGYQSTNSTETVDTLTENNVPVTHAKELLHTEHNGMLCATSLGQPLVLDTCITIEGLIYGNPSCDLSLEGREWSYIVERPSAVNGLCYPGNVNLEELRSLFSSARSYQRIQIFPDT<br>IWNVSYDGTSNACSGSFYRSIRWLTRKNGDYPIQDAQYTNQKGNILFMWGINQPTNQTQRDLYTRDTTTSVATEEINRIFKPLIGRPLVNLGMRIDYYWSVLKPGQTLRIKSDGNLIAPWYGHILSGESHG<br>RILKTDLKRGSCTVQCQTERGGNTLTPFNVSQYAFGNCSKYIGIKSLKLAVALRNVPSSRSLGFAIAGFIEGGWSGLVAGWYGFQHSNDQGVMAADRSTQKAIKITSKVNINVDKMNKYEIIDHEFS<br>EVETRLNMINNKIDDQIQDIWAYNAELLVLENQKTLDEHDANVNNLYNKVLRALGNSNAVEDGKGFELYHKCDDQCMETIRNGTYNRRKYQEESKLERQKIEGVKLESEGTYKILGGSGIVQQQNLLRAIE<br>AQHLLQLTVWGIKQLQARILAGSGGHTTWMEWDREINNYTSLIHSLEESQNOQEKNEQELLE*                                                                                                                                                                                                                                                                                                                                                                                                                                                                                                                                                                                                                                                                                                                                                                                                                                                                                                                                                                                                                                                                                                                                                                                                                                                                                                          |
